# Supplementary material for: Protective Role of AMPK against PINK1B9 Flies’ Neurodegeneration with Improved Mitochondrial Function
Source: Hindawi journal article supplement (doi:10.1155/2023/4422484), 2023-10-12
Supplement: f1 [file 4422484.f1.zip]

**A**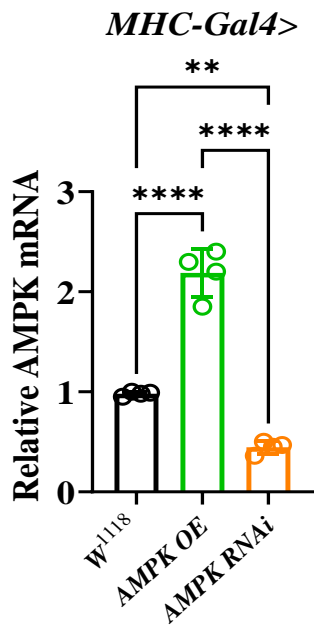**B**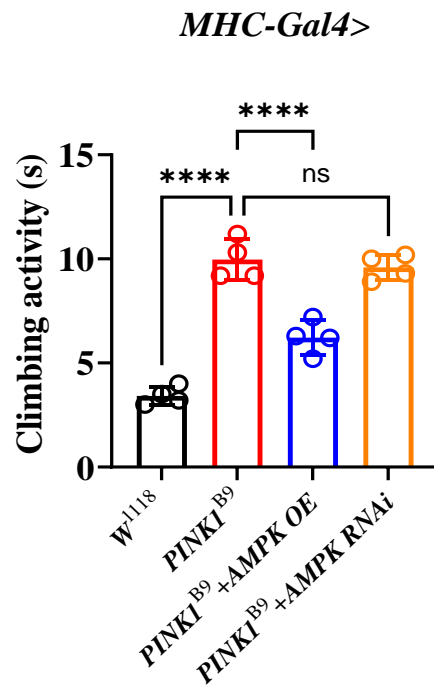

**Fig. S2.** Down regulation of AMPK did not rescue motor deficits of PINK1<sup>B9</sup> flies. (A) Relative AMPK mRNA expression in each group. (n≥5/group) (B) Climbing ability examined in each group. (n≥100/group) Values were expressed as mean ± S.D. (\*\*P<0.01, \*\*\*\*P<0.0001, ns=not significant).
