# Supplementary material for: Protective Role of AMPK against PINK1B9 Flies’ Neurodegeneration with Improved Mitochondrial Function
Source: Hindawi journal article supplement (doi:10.1155/2023/4422484), 2023-10-12
Supplement: f1 [file 4422484.f1.zip]

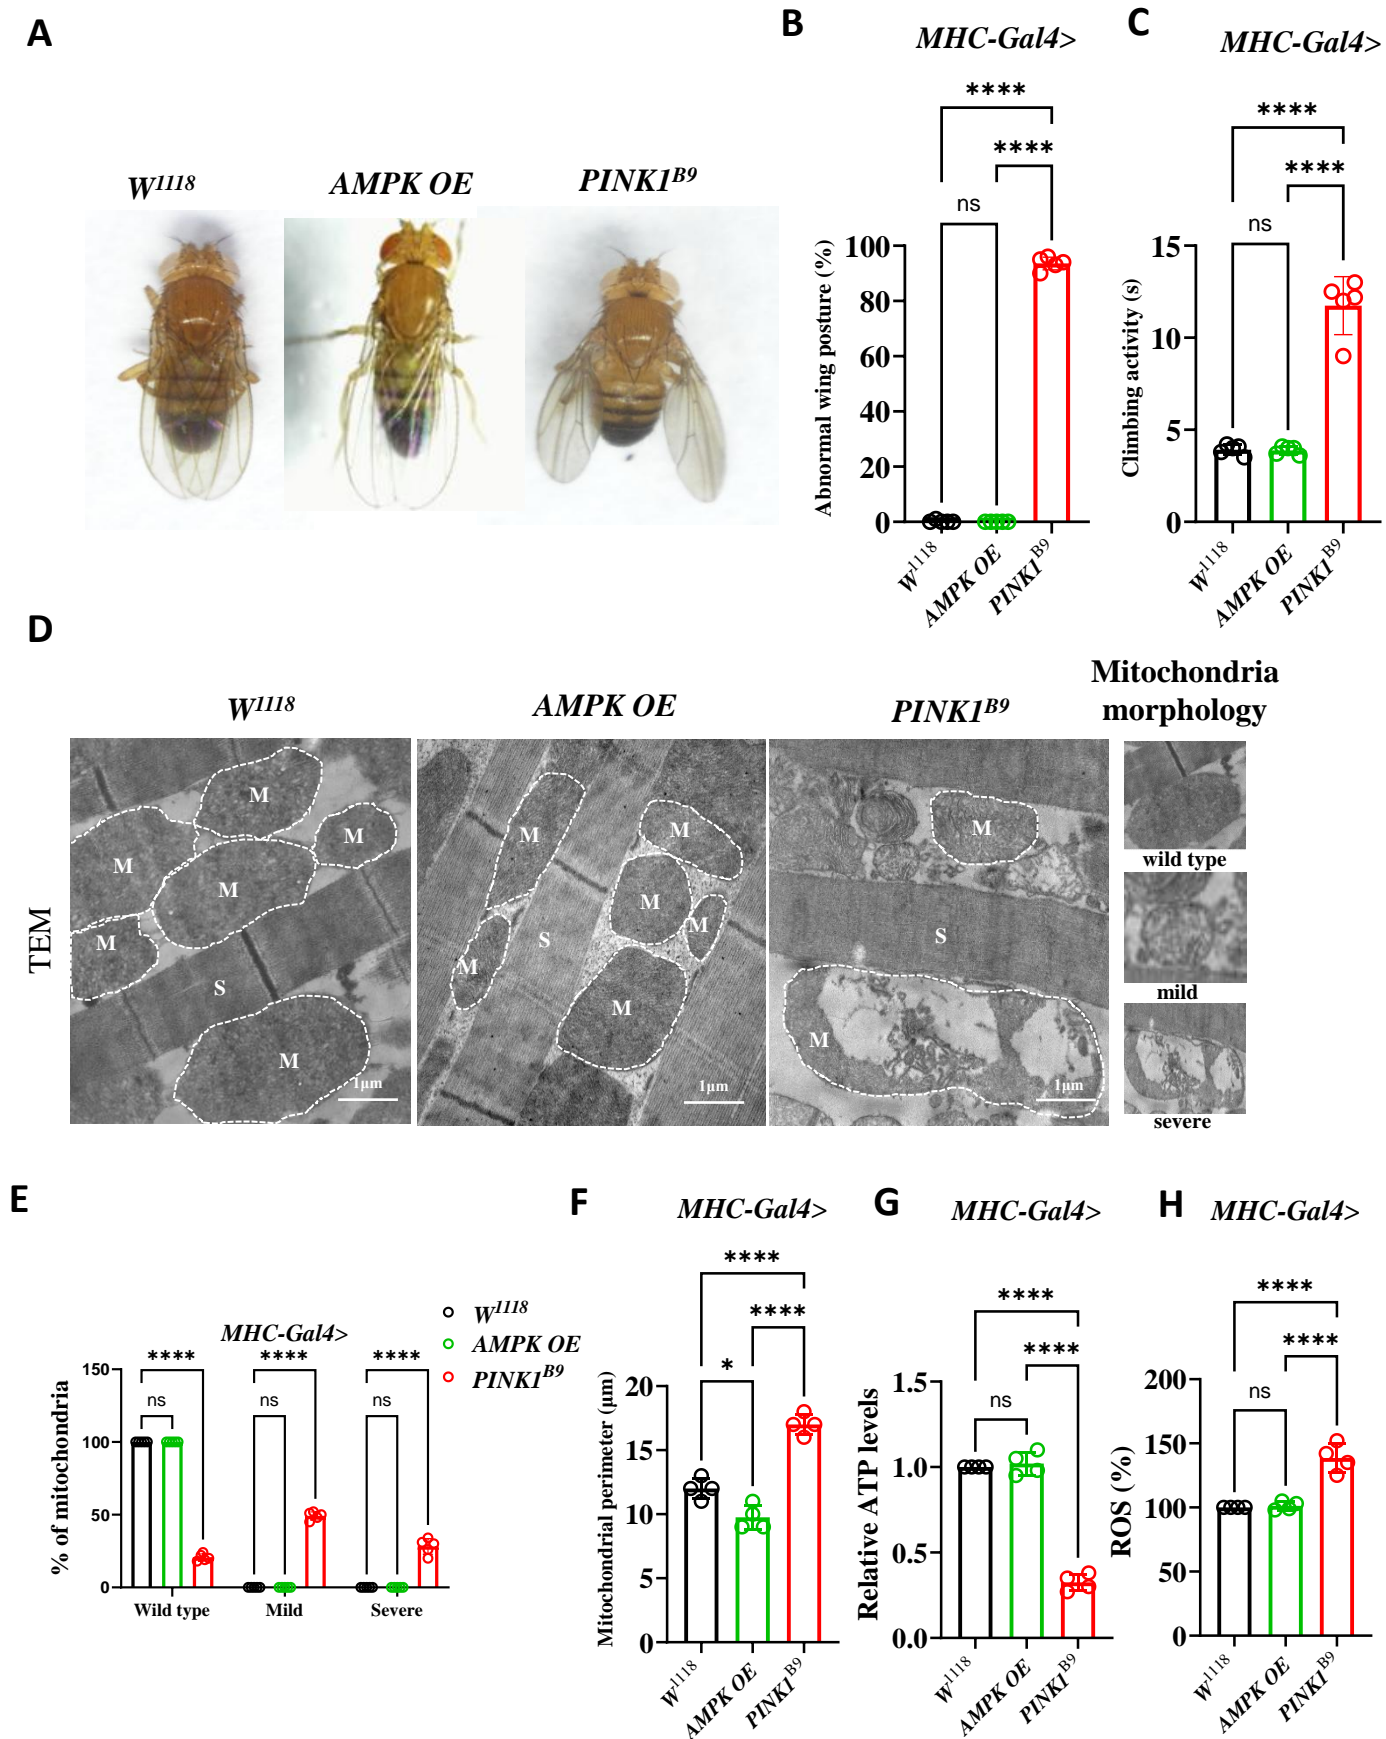

**Fig. S1.** Pathogenic features in *PINK1<sup>B9</sup>* flies.

(A) Wing posture phenotypes in the indicated genotypes of flies. ( $n \geq 3/\text{group}$ ) (B) and (C) Abnormal wing posture and flying ability tested in each group. ( $n \geq 100/\text{group}$ ) (D), (E) and (F) Representative TEM images of adult flight muscles showing mitochondrial morphology. ( $n \geq 4/\text{group}$ ) (G) and (H) Relative ATP and ROS levels tested in each group. ( $n \geq 5/\text{group}$ ) Values were expressed as mean  $\pm$  S.D. (\* $P < 0.05$ , \*\*\*\* $P < 0.0001$ , ns=not significant).
